# Supplementary material for: Enhancer of Zeste Homolog 2 (EZH2) Is a Marker of High-Grade Neuroendocrine Neoplasia in Gastroenteropancreatic and Pulmonary Tract and Predicts Poor Prognosis
Source: MDPI journal article supplement (doi:10.3390/cancers14122828), 2022-06-08
Supplement: s1 [file s1]

**Supplementary Table S3.** Characteristics of enrolled patients depending on tumor localization. NEN: neuroendocrine neoplasia, P: pulmonary, UICC: Union international contre le cancer

| Characteristic             | Intestinal<br>NEN<br>(n = 102) | Pancreatic<br>NEN<br>(n = 24) | P-NEN<br>(n = 93) |
|----------------------------|--------------------------------|-------------------------------|-------------------|
| Age median (range) [years] | 65 (18-87)                     | 63 (18-80)                    | 62 (20-81)        |
| Age No. (%) [years]        |                                |                               |                   |
| < 65                       | 50                             | 12                            | 53                |
| ≥ 65                       | 52                             | 12                            | 40                |
| Gender No. (%)             |                                |                               |                   |
| Female                     | 33                             | 9                             | 57                |
| Male                       | 62                             | 15                            | 36                |
| pT No. (%)                 |                                |                               |                   |
| 1+2                        | 41                             | 9                             | 77                |
| 3+4                        | 31                             | 10                            | 9                 |
| pN No. (%)                 |                                |                               |                   |
| 0                          | 18                             | 9                             | 58                |
| +                          | 29                             | 10                            | 17                |
| G No. (%)                  |                                |                               |                   |
| 1+2                        | 89                             | 20                            | 73                |
| 3                          | 13                             | 4                             | 20                |
| UICC stage No. (%)         |                                |                               |                   |
| I+II                       | 39                             | 14                            | 77                |
| III+IV                     | 33                             | 5                             | 9                 |
