# Supplementary material for: Enhancer of Zeste Homolog 2 (EZH2) Is a Marker of High-Grade Neuroendocrine Neoplasia in Gastroenteropancreatic and Pulmonary Tract and Predicts Poor Prognosis
Source: MDPI journal article supplement (doi:10.3390/cancers14122828), 2022-06-08

**Stage GEP-NEN**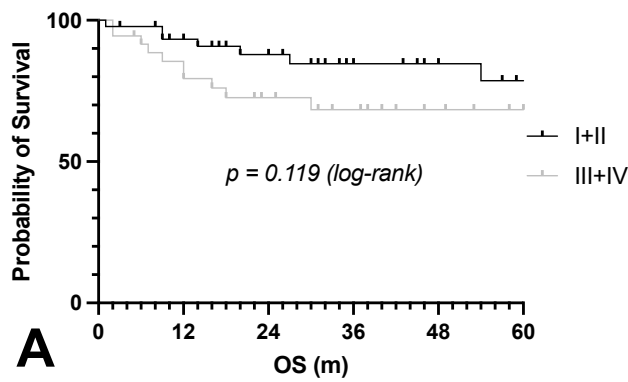**Stage P-NEN**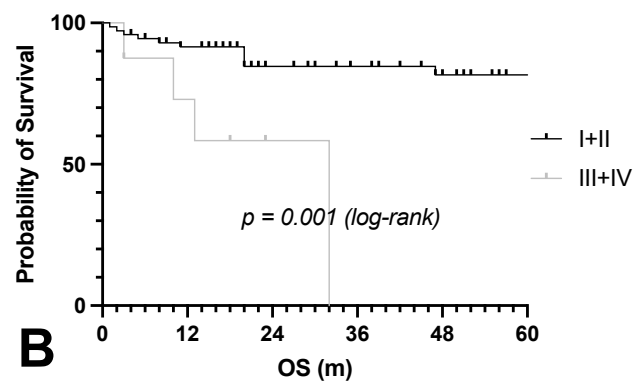**Age GEP-NEN**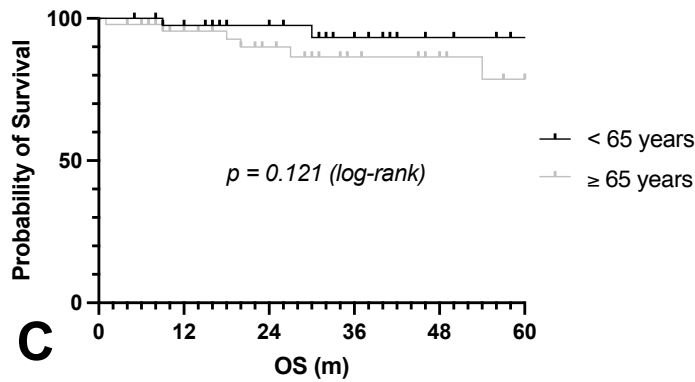**Age P-NEN**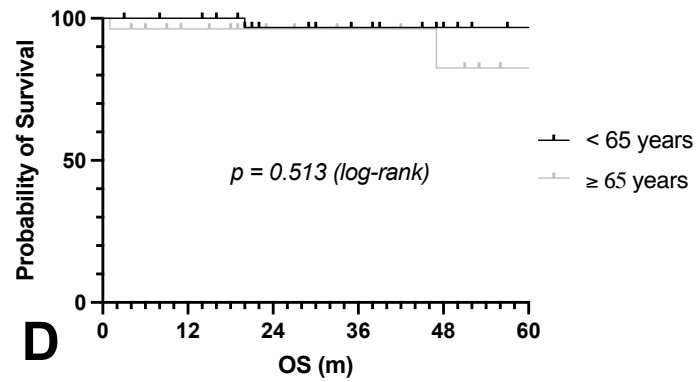**Gender GEP-NEN**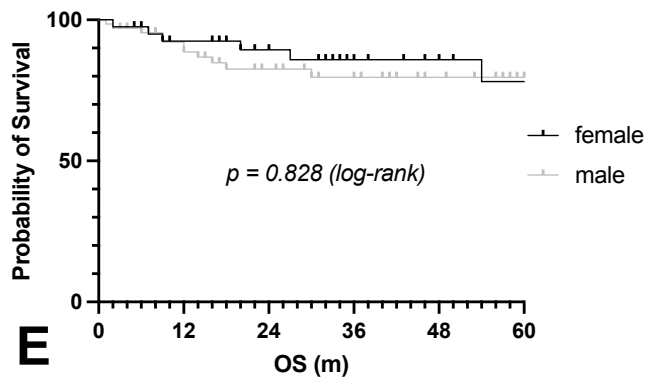**Gender P-NEN**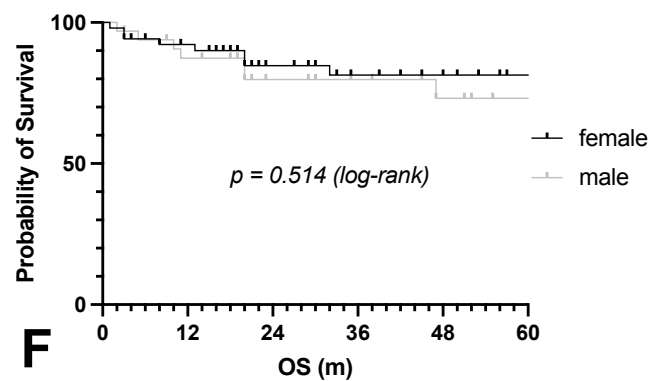**Grading GEP-NEN**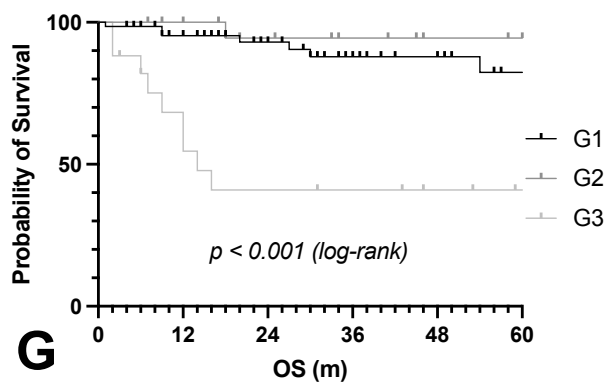**Grading P-NEN**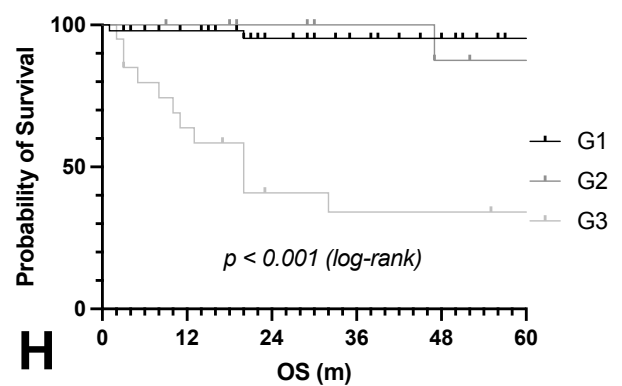

Supplement: s1 [file s1]
