# Supplementary figures and images for: Enhancer of Zeste Homolog 2 (EZH2) Is a Marker of High-Grade Neuroendocrine Neoplasia in Gastroenteropancreatic and Pulmonary Tract and Predicts Poor Prognosis
Source: MDPI journal article supplement (doi:10.3390/cancers14122828), 2022-06-08

**G3 GEP-NEN**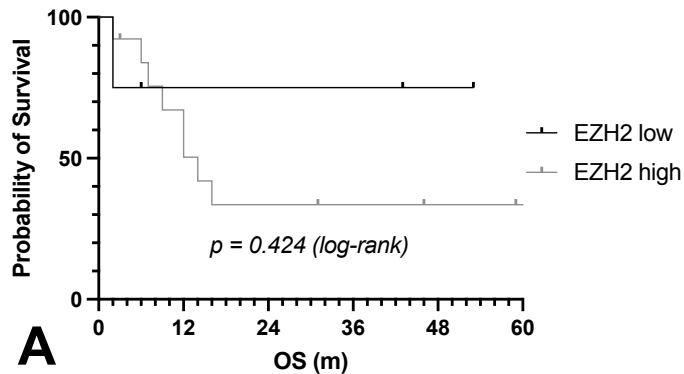**G3 P-NEN**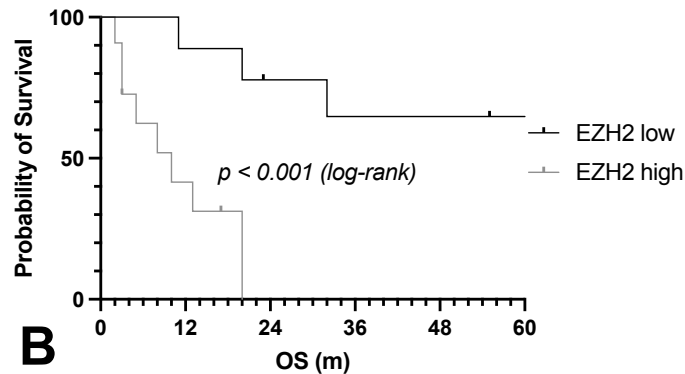**G3 GEP-NEN**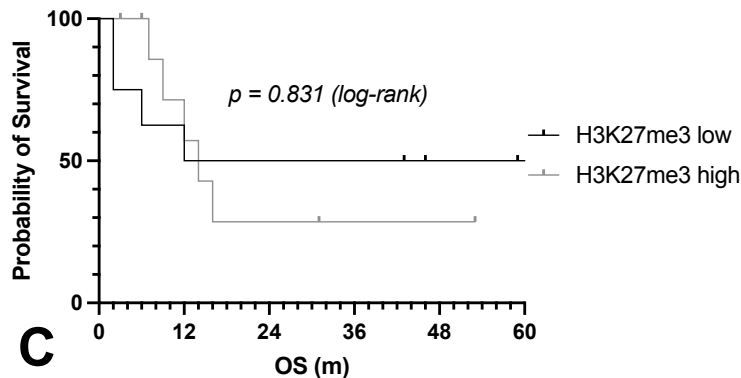**G3 P-NEN**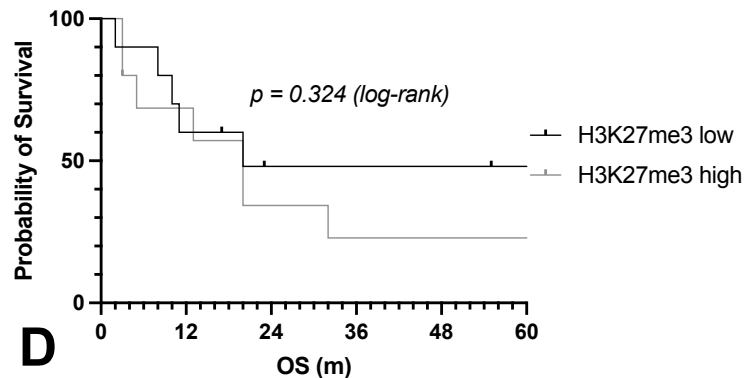

Supplement: s1 [file s1]

**G3 localization**

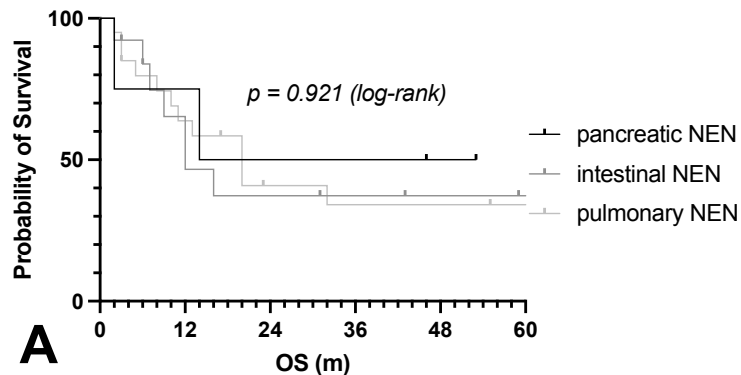

**overall localization**

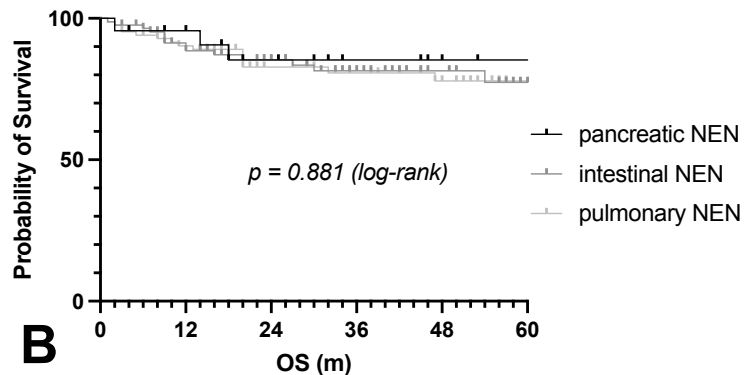

**localization**

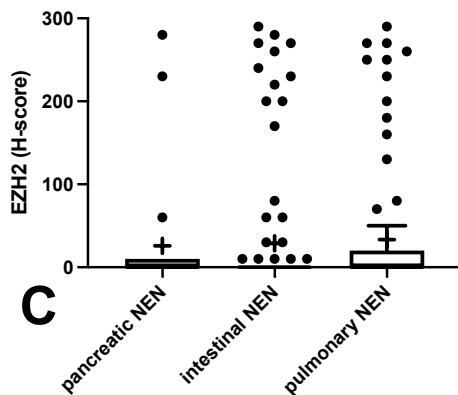

**localization and grading**

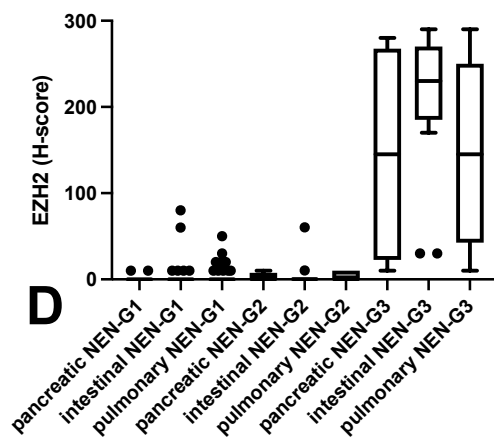

Supplement: s1 [file s1]
